# Supplementary material for: Comparison of leucocyte profiles between healthy children and those with asymptomatic and symptomatic Plasmodium falciparum infections
Source: PubMed Central journal article supplement (PMC7547495; doi:10.1186/s12936-020-03435-x), 2020-10-09
Supplement: 12936_2020_3435_MOESM1_ESM.pdf [file 12936_2020_3435_MOESM1_ESM.pdf]

# Viable

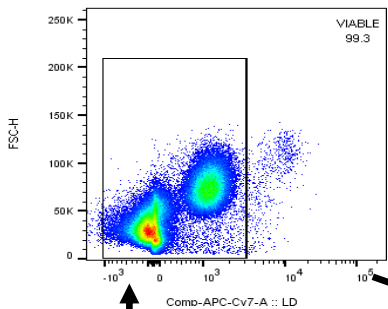

# singlet

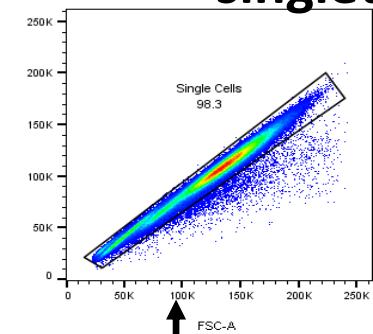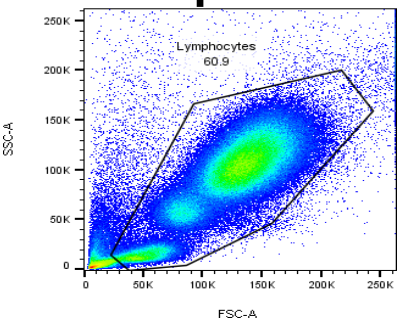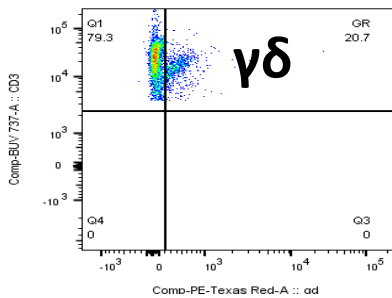

# CD8

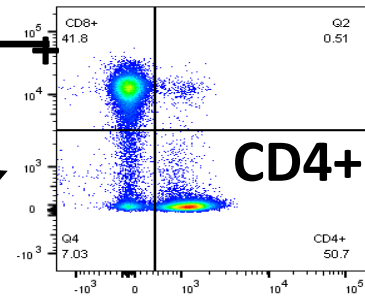

# CD3+

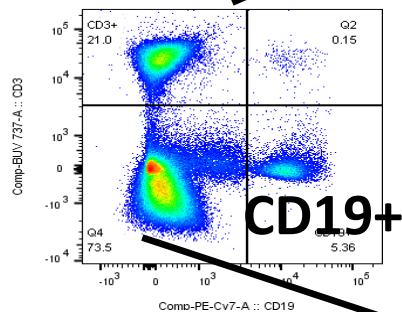

# CD14+

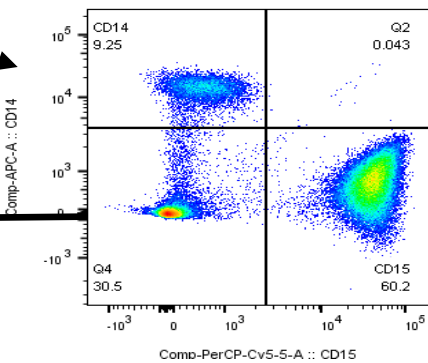

# CD11c+

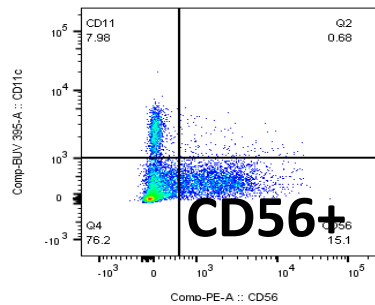

# CD15+
