# Supplementary material for: Comparison of leucocyte profiles between healthy children and those with asymptomatic and symptomatic Plasmodium falciparum infections
Source: PubMed Central journal article supplement (PMC7547495; doi:10.1186/s12936-020-03435-x), 2020-10-09

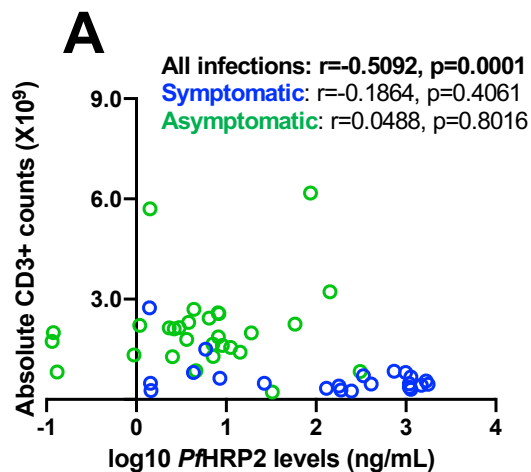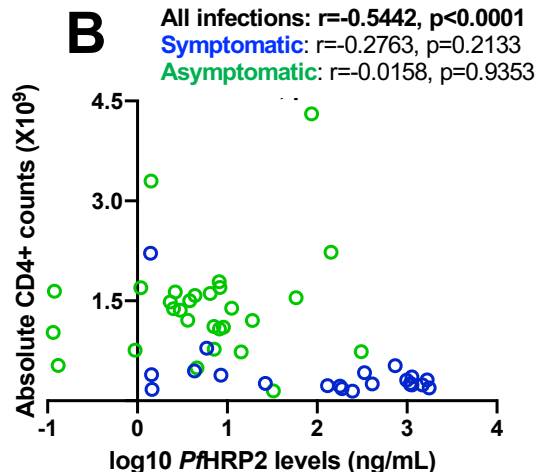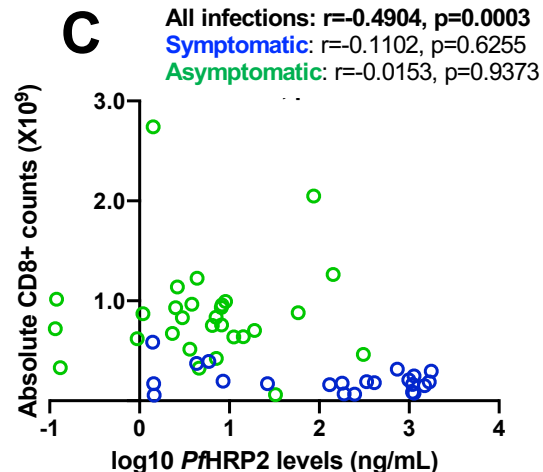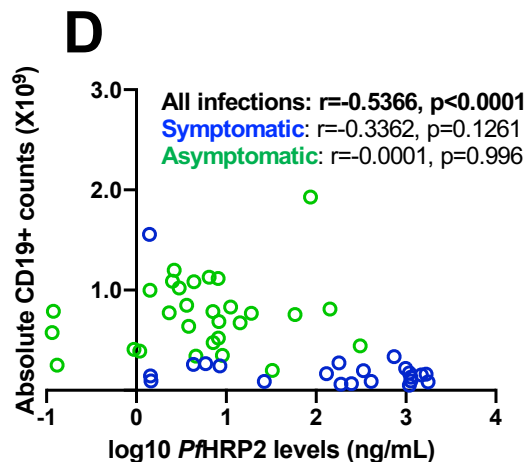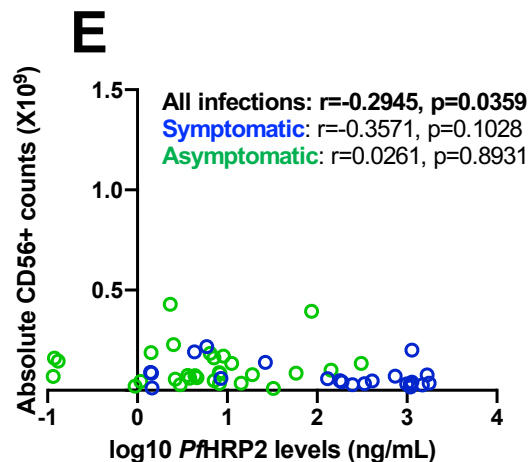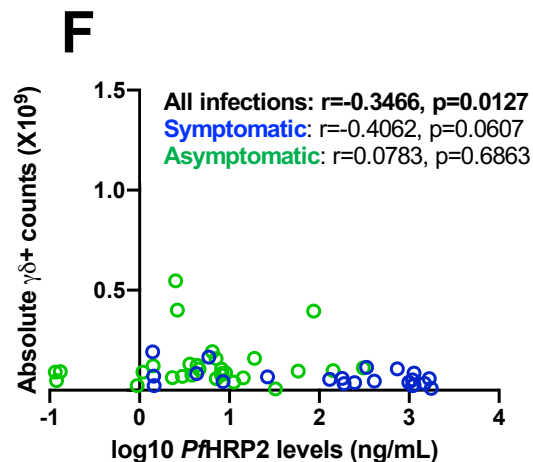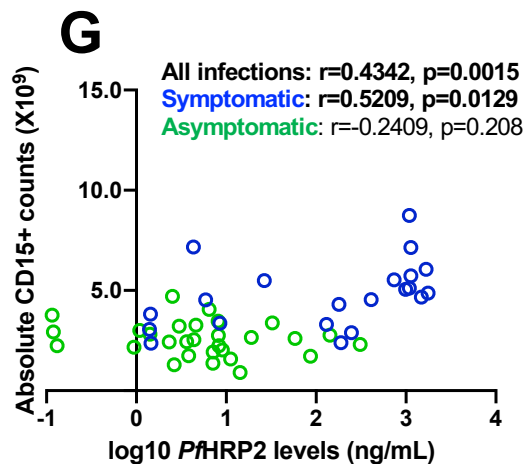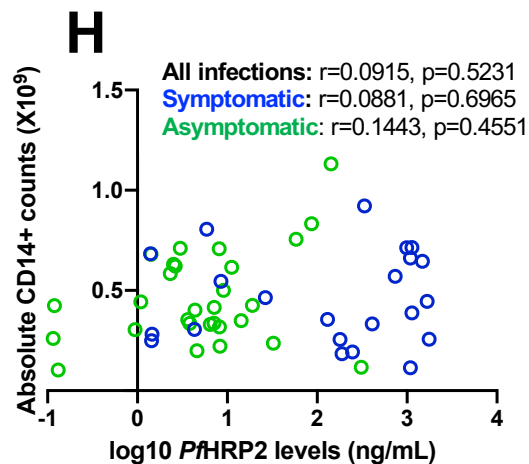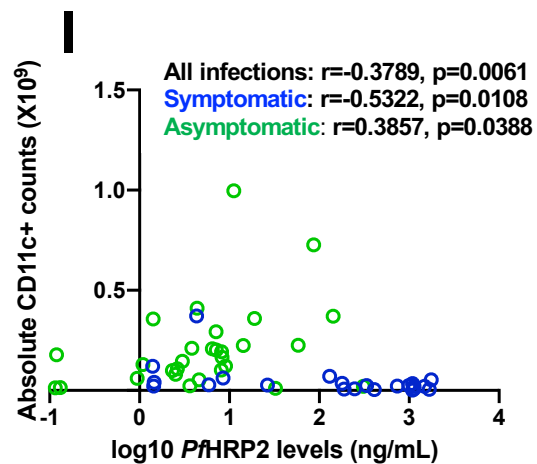

Supplement: 12936_2020_3435_MOESM3_ESM.pdf [file 12936_2020_3435_MOESM3_ESM.pdf]
