# Supplementary material for: Comparison of leucocyte profiles between healthy children and those with asymptomatic and symptomatic Plasmodium falciparum infections
Source: Springer Nature journal article supplement (doi:10.1186/s12936-020-03435-x), 2020-10-09

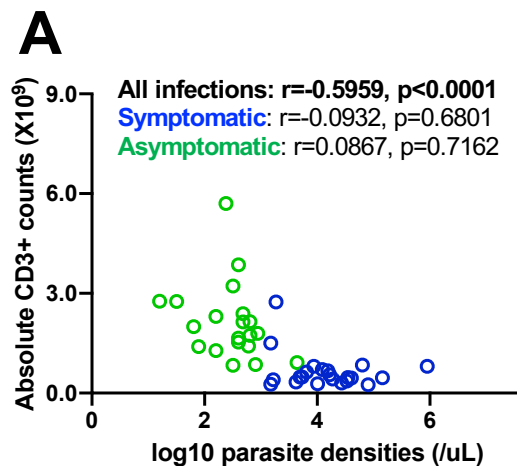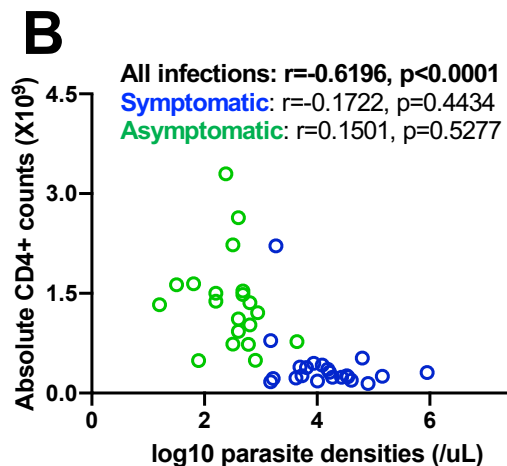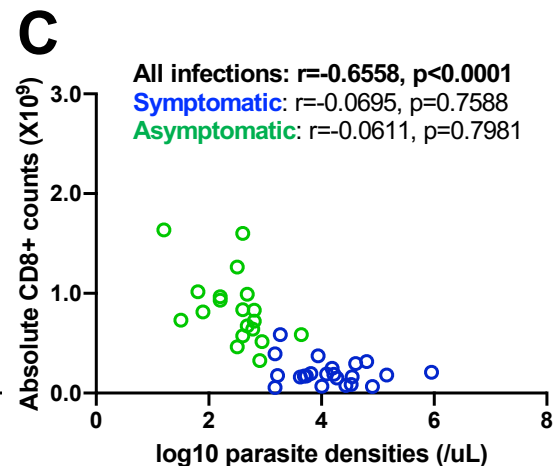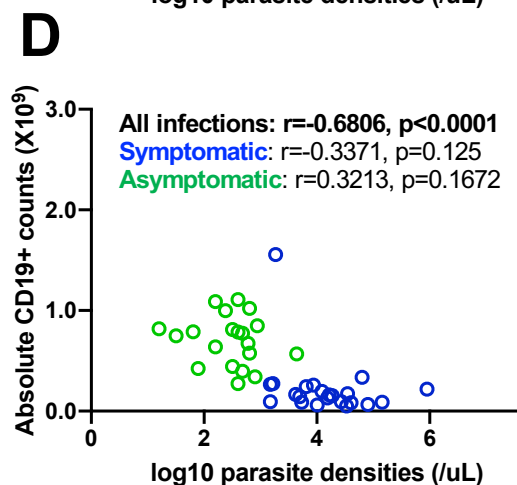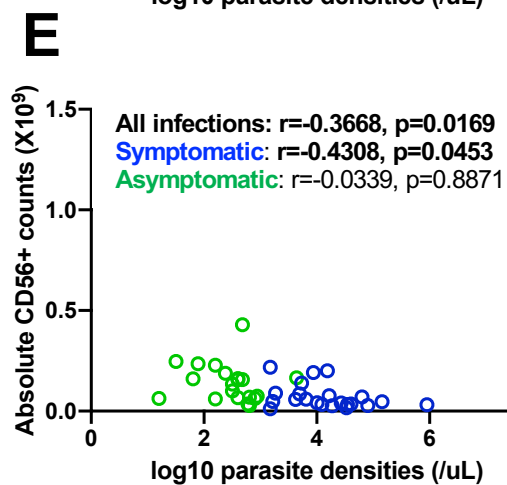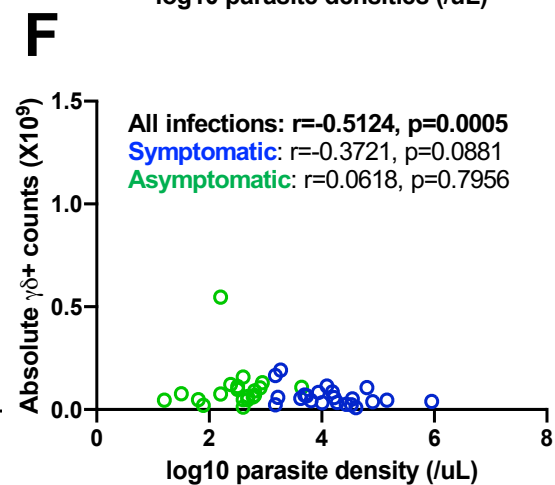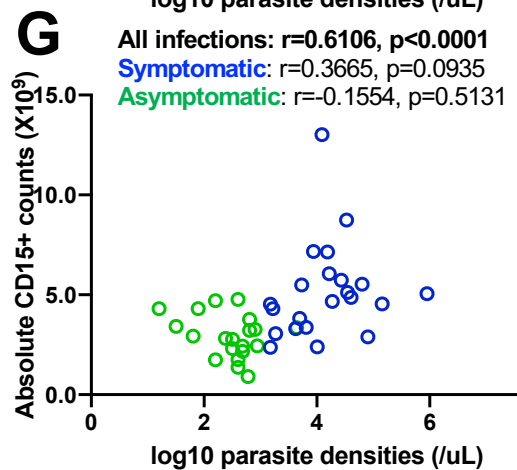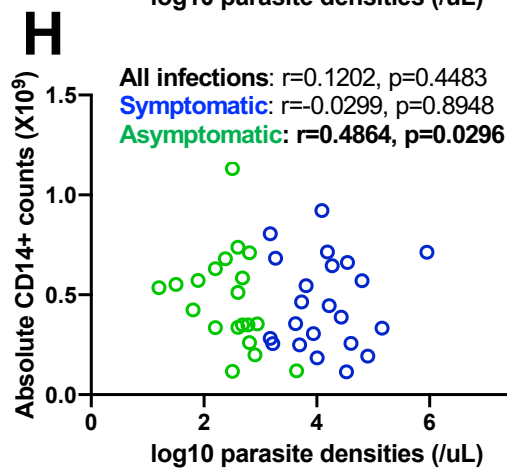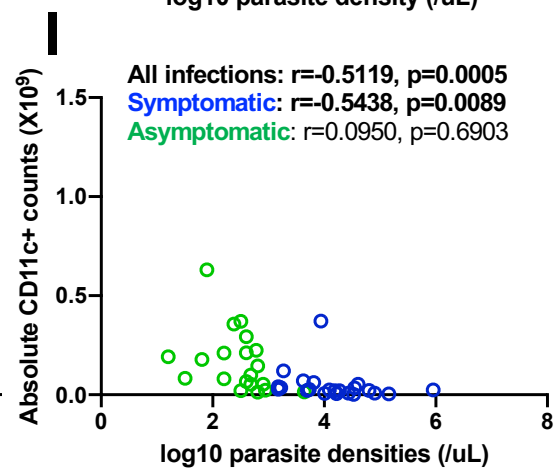

Supplement: MOESM4 [file 18467846]
